# Supplementary material for: Two tagSNPs rs352493 and rs3760908 withinSIRT6Gene Are Associated with the Severity of Coronary Artery Disease in a Chinese Han Population
Source: Hindawi journal article supplement (doi:10.1155/2016/1628041), 2016-01-01
Supplement: f1 [file 1628041.f1.pdf]

**TABLE S1:** The information for alleles captured by rs11878868, rs107251, rs352493, rs4807546 and rs3760908, accordingly.

| Alleles captured | Location | tagSNP     | $r^2$ | Potential function <sup>a</sup> |       | Reported traits                     | Reference |
|------------------|----------|------------|-------|---------------------------------|-------|-------------------------------------|-----------|
|                  |          |            |       | TFBS                            | miRNA |                                     |           |
| rs11878868       | 3' UTR   | rs11878868 | 1.0   | -                               | -     | -                                   | -         |
| rs350844         | Intron 4 | rs107251   | 1.0   | -                               | -     | -                                   | -         |
| rs107251         | Intron 4 | rs107251   | 1.0   | -                               | -     | carotid plaque, Aging and longevity | [31,32]   |
| rs352493         | Intron 2 | rs352493   | 1.0   | -                               | -     | -                                   | -         |
| rs4807546        | Intron 1 | rs4807546  | 1.0   | Y                               | -     | -                                   | -         |
| rs3760908        | 5' UTR   | rs3760908  | 1.0   | Y                               | -     | -                                   | -         |
| rs3760905        | 5' UTR   | rs3760908  | 1.0   | Y                               | -     | carotid plaque                      | [31]      |

<sup>a</sup> The potential functions of the SNPs were predicted by online webserver (<http://snpinfo.niehs.nih.gov/snpinfo/snpfunc.htm>)

**TABLE S2:** The sequences of the primers and probes used to genotype the rs11878868, rs107251, rs352493, rs4807546 and rs3760908 polymorphisms.

[illegible]
